# Supplementary material for: Incorporating N Atoms into SnO2 Nanostructure as an Approach to Enhance Gas Sensing Property for Acetone
Source: MDPI journal article supplement (doi:10.3390/nano9030445), 2019-03-15
Supplement: s1 [file s1]

## Supporting Information:

# Incorporating N atoms into SnO<sub>2</sub> nanostructure as an approach to enhance gas sensing property for acetone

Xiangfeng Guan <sup>1,\*</sup>, Yongjing Wang <sup>2</sup>, Peihui Luo <sup>1</sup>, Yunlong Yu <sup>1</sup>, Dagui Chen <sup>1</sup>, and Xiaoyan Li <sup>1</sup>

<sup>1</sup> Organic Optoelectronics Engineering Research Center of Fujian's Universities, Fujian Jiangxia University, Fuzhou 350108, P.R. China; xfguan@fjxu.edu.cn(X.G.); phluo@fjxu.edu.cn (P. L.); ylyu@fjxu.edu.cn (Y.Y); dgchen@fjxu.edu.cn (D.C.); xyl@fjxu.edu.cn (X. L.).

<sup>2</sup> College of Environment and Resources, Fuzhou University, Fuzhou 350108, P.R. China; yjwang03@fzu.edu.cn

\* Correspondence: xfguan@fjxu.edu.cn (X.G.); Tel.: +86-591-2353-1652

Figure S1:

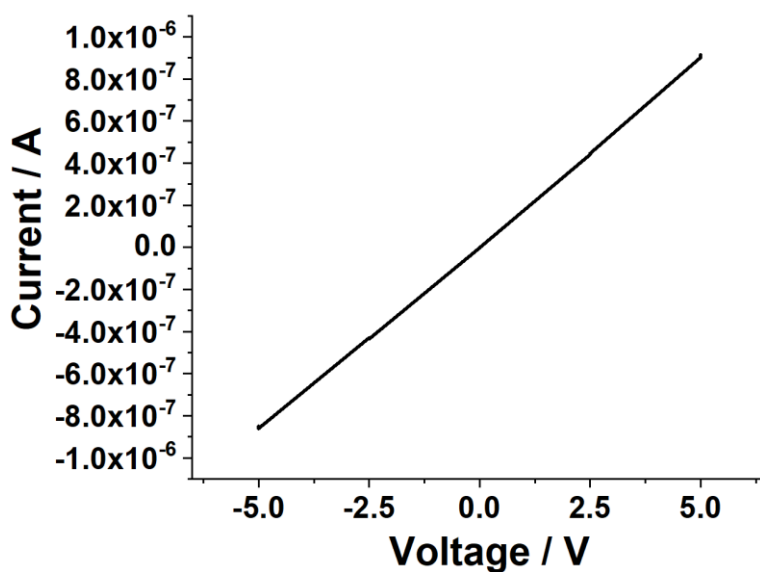

Figure S1. The V-I curve of the N-incorporated SnO<sub>2</sub> sample on Ag electrodes coated Al<sub>2</sub>O<sub>3</sub> substrate at 300 °C

Figure S2:

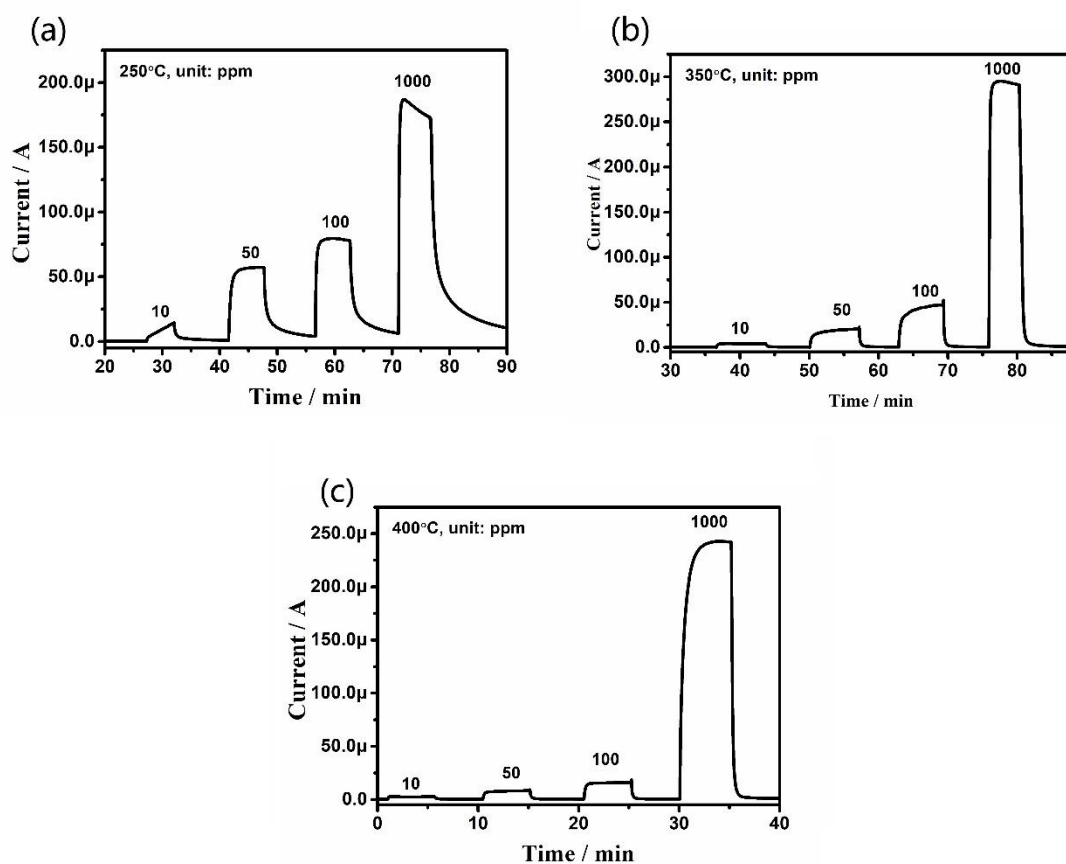

Figure S2. Typical response-recovery current curves of the N-incorporated SnO<sub>2</sub> gas sensor toward acetone gas with different concentration at different temperatures: (a) 250 °C; (b) 350 °C; (c) 400 °C.

Figure S3:

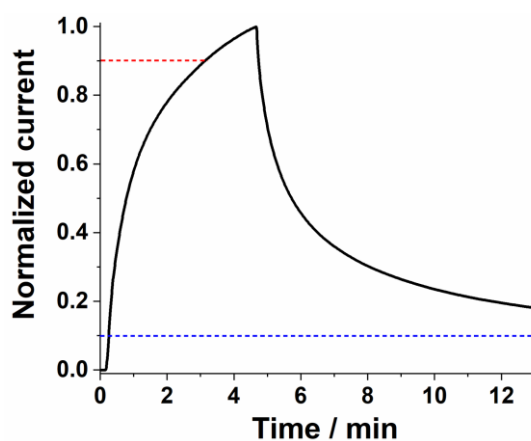

Figure S3. The response and recovery curve for the N-incorporated SnO<sub>2</sub> sample toward 1 ppm of acetone at 200 °C

Figure S4:

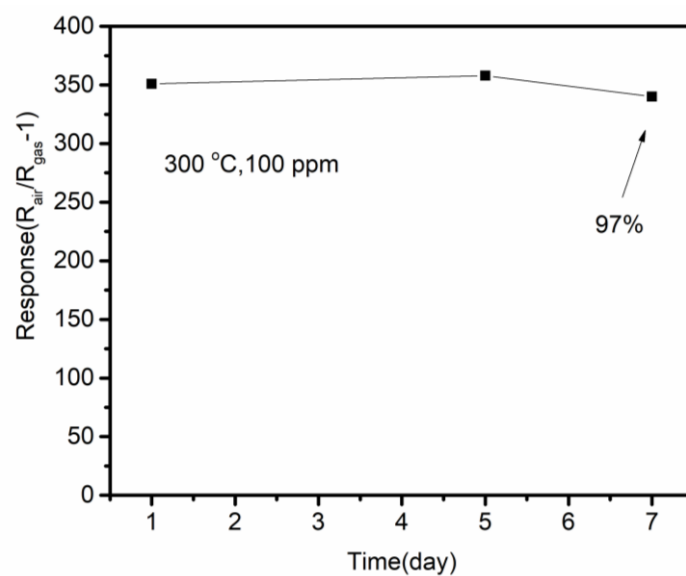

Figure S4. Stability response curve of the N-incorporated SnO<sub>2</sub> gas sensor toward 100 ppm of acetone at 300 °C.

Table S1: The repeatability within a batch of three samples

| Sample number | Acetone concentration (ppm) | Working temperature (°C) | Sensor Response ( $R_{air}/R_{gas}-1$ ) | Relative standard deviation (RSD) |
|---------------|-----------------------------|--------------------------|-----------------------------------------|-----------------------------------|
| 1#            | 100                         | 300                      | 357                                     | 2%                                |
| 2#            | 100                         | 300                      | 351                                     |                                   |
| 3#            | 100                         | 300                      | 343                                     |                                   |
